# Supplementary material for: LncRNA VPS9D1-AS1 promotes cell proliferation in acute lymphoblastic leukemia through modulating GPX1 expression by miR-491-5p and miR-214-3p evasion
Source: PubMed Central journal article supplement (PMC7536331; doi:10.1042/bsr20193461), 2020-10-05
Supplement: BSR-2019-3461_supp.pdf [file BSR-2019-3461_supp.pdf]

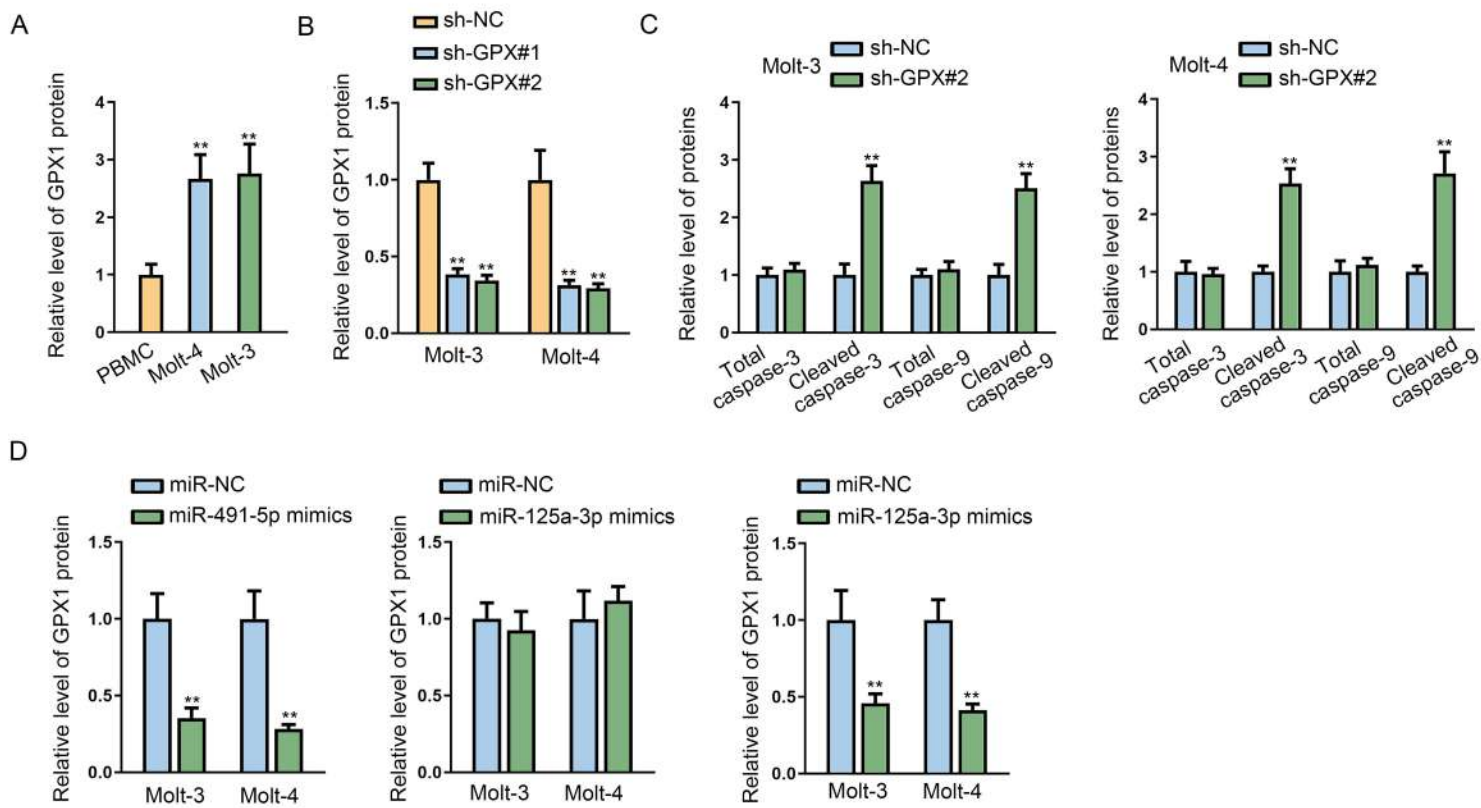

**Supplementary Figure 1.** A-D. Quantitative histogram of western blots in Figures 1B (A), 1C (B), 1I (C) and 2E (D), respectively. \*\*P < 0.01.

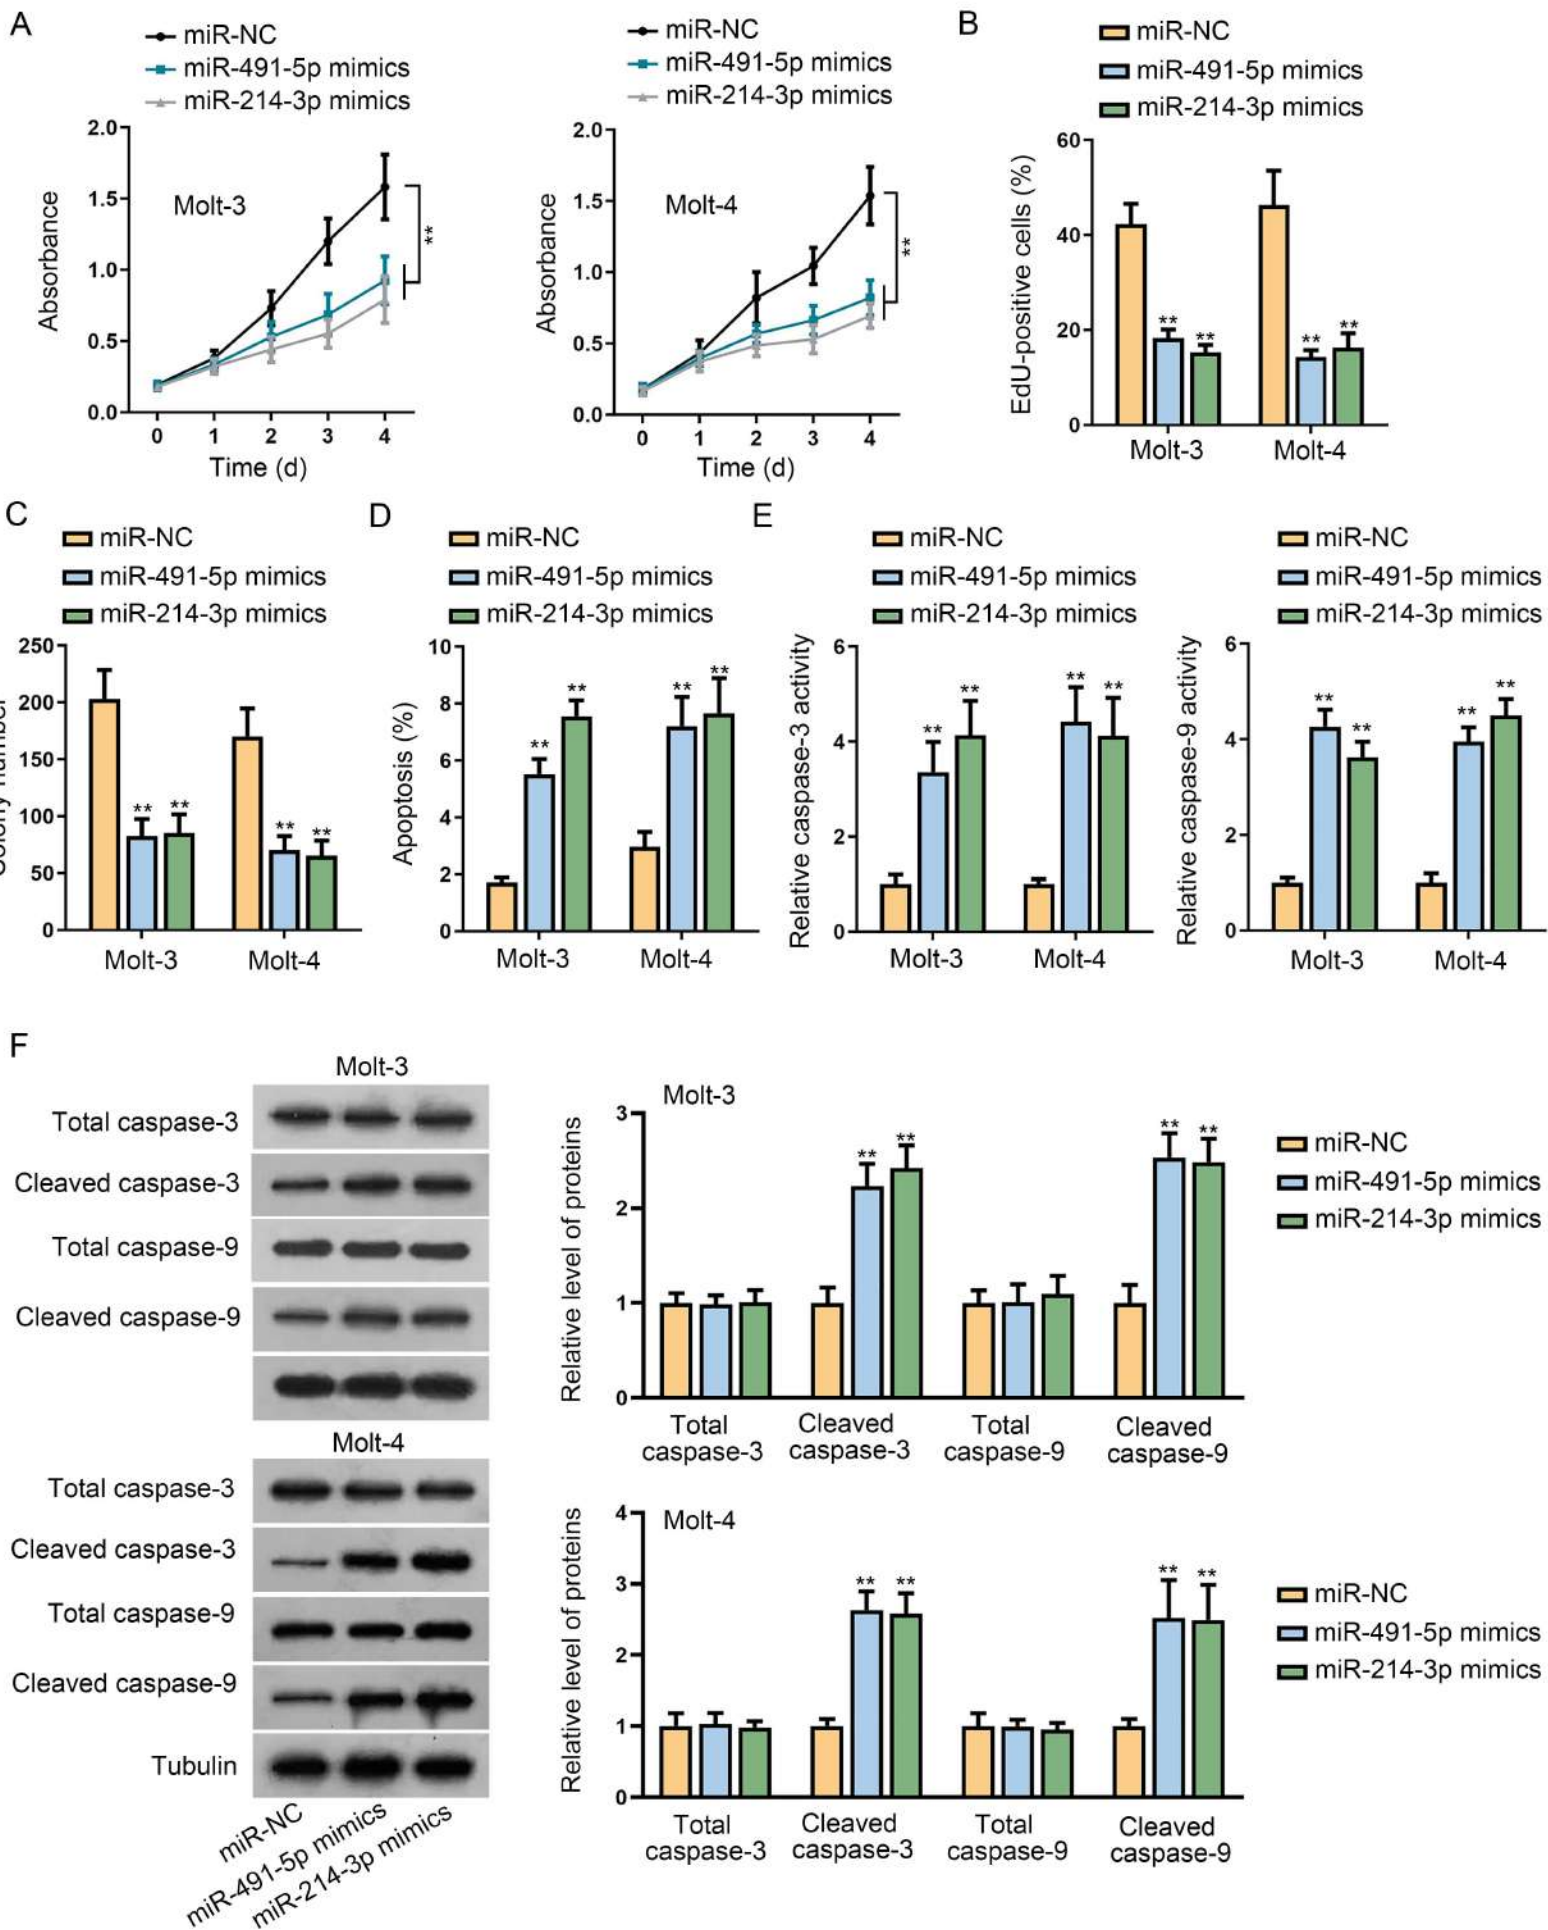

**Supplementary Figure 2.** A. The viability of ALL cells with overexpressed miR-491-5p or miR-214-3p was detected by CCK-8 assay. B-C. The impact of overexpressed miR-491-5p or miR-214-3p on the proliferation of ALL cells was determined via EdU and colony formation assays. D-E. Cell apoptosis under above conditions was assessed by flow cytometry analysis and caspase-3/9 activity detection. F. Western blot examined the level of several apoptosis-related proteins, with corresponding quantitative histograms beside. \*\*P < 0.01.

A

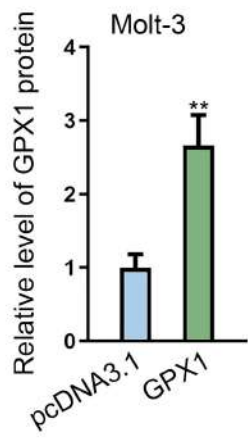

B

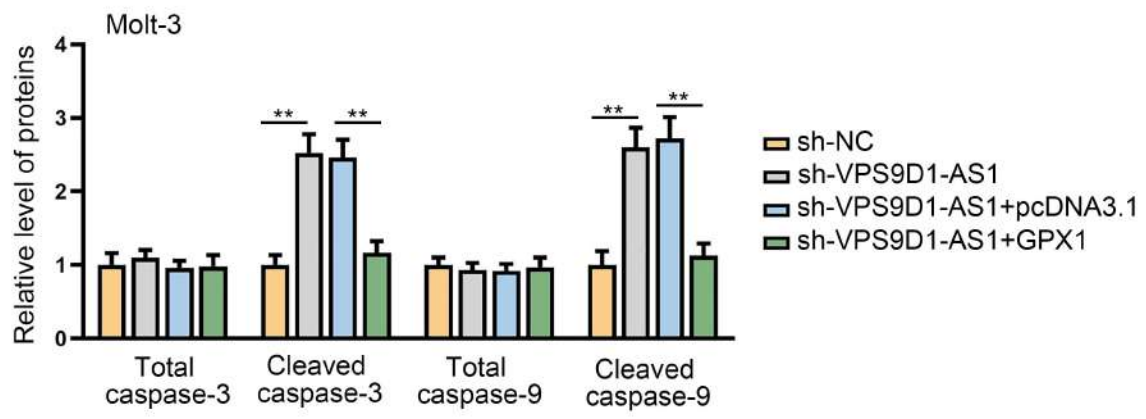

**Supplementary Figure 3.** A. The bar graph of quantified bands in Figure 4A. B. The bar graph of quantified bands in Figure 4G. \*\*P < 0.01.

A

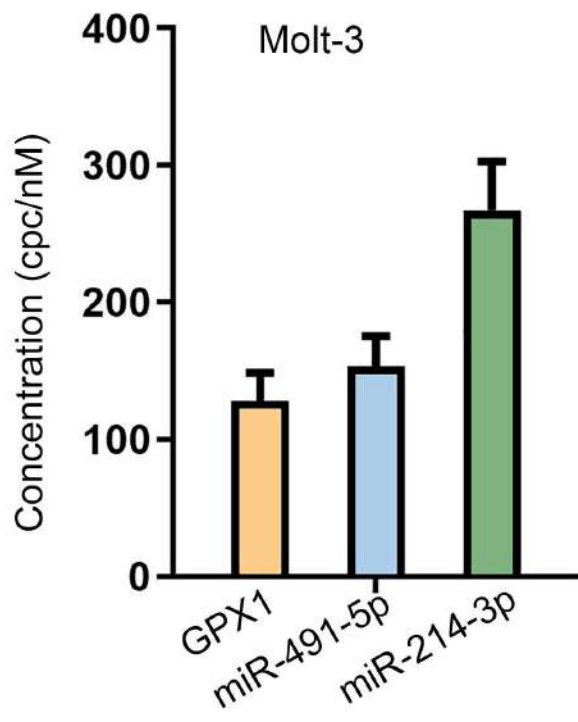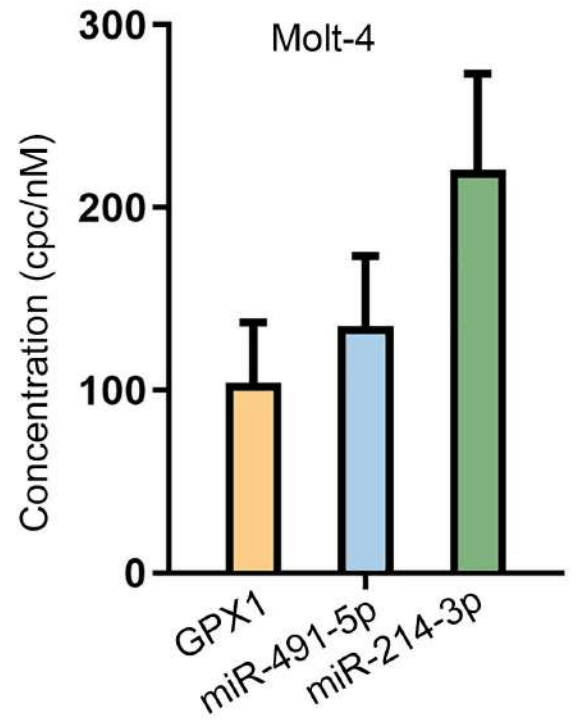

**Supplementary file 1.** A. The concentration of GPX1, miR-491-5p and miR-214-3p in Molt-3 and Molt-4 cells was determined using External RNA Controls Consortium RNA spike-in standards (Life Technologies).
